# Supplementary material
Source: MDPI journal article supplement (https://www.mdpi.com/2071-1050/12/15/6100)
Supplement: s1 [file s1]

## **S1: Questionnaire/ Survey - Industry 4.0**

### **Section A (Personal Details)**

**1. Age**

- ☐ 18 to 24
- ☐ 25 to 34
- ☐ 35 to 44
- ☐ 45 to older

**2. Gender**

- ☐ Female
- ☐ Male

**3. Educational Qualification**

- ☐ Under Graduate
- ☐ Graduate
- ☐ Post-Graduate
- ☐ Prefer not to say

**4. Department and College**

---

**5. Primary role in the mentioned department**

---

**6. Research area, main subjects or specialization**

---

**7. For how long have you been in the current role**

- ☐ Less than a year
- ☐ 1 - 3 years
- ☐ 3 - 5 years
- ☐ 5 – 10 years
- ☐ More than 10 years

**8. How many researchers (or students) are working in the laboratory?**

- 1-2
- 2-5
- 5-10
- More than 10

**Awareness of the concept of Industry 4.0 and its basics**

**1. Have you ever come across about the term Industry 4.0?**

- Yes
- No

**2. How did you know about Industry 4.0?**

- Research papers/published books
- Surfing/Online advertisements
- Seminar/workshop in the department
- Course book/from the teacher
- Other. If the answer is other, please mention the source (if possible):

**3. Have you heard about the following terminologies**

|                           |                          |                          |                                     |                          |
|---------------------------|--------------------------|--------------------------|-------------------------------------|--------------------------|
| A) Sensor                 | <input type="checkbox"/> | <input type="checkbox"/> | <input type="checkbox"/>            | Yes                      |
| No                        | Well-informed            |                          |                                     |                          |
| B) Additive Manufacturing | <input type="checkbox"/> | <input type="checkbox"/> | Yes                                 | <input type="checkbox"/> |
| No                        | Well-informed            |                          |                                     |                          |
| C) Simulation             | <input type="checkbox"/> | <input type="checkbox"/> | <input type="checkbox"/>            | Yes                      |
| No                        | Well-informed            |                          |                                     |                          |
| D) Augmented Reality      | <input type="checkbox"/> | <input type="checkbox"/> | Yes                                 | <input type="checkbox"/> |
| No                        | Well-informed            |                          |                                     |                          |
| E) Autonomous Robots      | <input type="checkbox"/> | <input type="checkbox"/> | Yes                                 | <input type="checkbox"/> |
| No                        | Well-informed            |                          |                                     |                          |
| F) System Integration     | <input type="checkbox"/> | <input type="checkbox"/> | Yes                                 | <input type="checkbox"/> |
| No                        | Well-informed            |                          |                                     |                          |
| G) Big Data               | <input type="checkbox"/> | <input type="checkbox"/> | <input type="checkbox"/>            | Yes                      |
| No                        | Well-informed            |                          |                                     |                          |
| H) Cybersecurity          | <input type="checkbox"/> | <input type="checkbox"/> | <input checked="" type="checkbox"/> | Yes                      |
| No                        | Well-informed            |                          |                                     |                          |
| I) Cloud Manufacturing    | <input type="checkbox"/> | <input type="checkbox"/> | Yes                                 | <input type="checkbox"/> |
| No                        | Well-informed            |                          |                                     |                          |

|                          |                          |                          |                                         |
|--------------------------|--------------------------|--------------------------|-----------------------------------------|
| J) Internet of Things    | <input type="checkbox"/> | <input type="checkbox"/> | Yes <input type="checkbox"/>            |
| No                       | Well-informed            |                          |                                         |
| K) Cyber-Physical System | <input type="checkbox"/> | <input type="checkbox"/> | Yes <input type="checkbox"/>            |
| No                       | Well-informed            |                          |                                         |
| L) Smart Factory         | <input type="checkbox"/> | <input type="checkbox"/> | <input checked="" type="checkbox"/> Yes |
| No                       | Well-informed            |                          |                                         |
| M) Modularity            | <input type="checkbox"/> | <input type="checkbox"/> | <input type="checkbox"/> Yes            |
| No                       | Well-informed            |                          |                                         |
| N) Interoperability      | <input type="checkbox"/> | <input type="checkbox"/> | <input checked="" type="checkbox"/> Yes |
| No                       | Well-informed            |                          |                                         |
| O) Reconfiguration       | <input type="checkbox"/> | <input type="checkbox"/> | <input checked="" type="checkbox"/> Yes |
| No                       | Well-informed            |                          |                                         |
| P) Decentralization      | <input type="checkbox"/> | <input type="checkbox"/> | <input checked="" type="checkbox"/> Yes |
| No                       | Well-informed            |                          |                                         |

4. Have you ever attended any event or seminar focusing on the Industry 4.0?

- ☐ Yes
- ☐ No

5. Do you agree that Government/University's willingness (or agreement) can play a significant role in realizing Industry 4.0?

|                            |                            |                            |                            |                            |
|----------------------------|----------------------------|----------------------------|----------------------------|----------------------------|
| <input type="checkbox"/> 1 | <input type="checkbox"/> 2 | <input type="checkbox"/> 3 | <input type="checkbox"/> 4 | <input type="checkbox"/> 5 |
| Entirely disagree          |                            |                            |                            | Strongly agree             |

6. Do you agree that the experts and staff needed to develop the specialized talents have to be in sufficient numbers within the university?

|                            |                            |                            |                            |                            |
|----------------------------|----------------------------|----------------------------|----------------------------|----------------------------|
| <input type="checkbox"/> 1 | <input type="checkbox"/> 2 | <input type="checkbox"/> 3 | <input type="checkbox"/> 4 | <input type="checkbox"/> 5 |
| Entirely disagree          |                            |                            |                            | Strongly agree             |

7. Do you agree that the possession of the required infrastructure in labs is mandatory to Industry 4.0?

|                            |                            |                            |                            |                            |
|----------------------------|----------------------------|----------------------------|----------------------------|----------------------------|
| <input type="checkbox"/> 1 | <input type="checkbox"/> 2 | <input type="checkbox"/> 3 | <input type="checkbox"/> 4 | <input type="checkbox"/> 5 |
| Entirely disagree          |                            |                            |                            | Strongly agree             |

- ☐ 1    ☐ 2    ☐ 3    ☐ 4    ☐ 5
- Not at all                                          Very Significantly

- ☐ 1      ☐ 2      ☐ 3      ☐ 4      ☐ 5  
Very poor                                  Very high

- ☐ 1    ☐ 2    ☐ 3    ☐ 4    ☐ 5  
Entirely disagree                      Strongly agree

- ☐ 1    ☐ 2    ☐ 3    ☐ 4    ☐ 5  
Entirely disagree                      Strongly agree

- ☐ 1    ☐ 2    ☐ 3    ☐ 4    ☐ 5  
Entirely disagree                      Strongly agree

- ☐ 1    ☐ 2    ☐ 3    ☐ 4    ☐ 5  
Entirely disagree                      Strongly agree

- 4



- ☐ 1    ☐ 2    ☐ 3    ☐ 4    ☐ 5  
Entirely disagree                      Strongly agree

- ☐ 1    ☐ 2    ☐ 3    ☐ 4    ☐ 5  
Entirely disagree                      Strongly agree

- ☐ 1    ☐ 2    ☐ 3    ☐ 4    ☐ 5  
Entirely disagree                      Strongly agree

- ☐ 1    ☐ 2    ☐ 3    ☐ 4    ☐ 5  
Entirely disagree                      Strongly agree

- ☐ 1    ☐ 2    ☐ 3    ☐ 4    ☐ 5  
Entirely disagree                      Strongly agree

- ☐ 1    ☐ 2    ☐ 3    ☐ 4    ☐ 5
- Entirely disagree                      Strongly agree

- ☐ 1    ☐ 2    ☐ 3    ☐ 4    ☐ 5  
Entirely disagree                      Strongly agree

- ☐ 1    ☐ 2    ☐ 3    ☐ 4    ☐ 5  
Entirely disagree                      Strongly agree

30. Is employee fear and concerns a serious threat to the implementation of industry 4.0?

☐ 1    ☐ 2    ☐ 3    ☐ 4    ☐ 5  
Entirely disagree                      Strongly agree

31. What actions do you think would be most suitable to the implementation of Industry 4.0 in your laboratory? (suggest at least three options from the following)

- Information events or seminars in the university
- Encourage more publications within this area
- Expert training to some with some initial knowledge and then this group would be utilized to train the rest within the region
- Online portal (both in English and Arabic) to support knowledge sharing. People can clarify queries and doubts as well as benefits from the available pool of information
- Increased cooperation between companies and research institutions
- Others (if any). Please write in the space below

32. Which technologies and tools related to Industry 4.0 is being used in your laboratory?

- 3D Printing
- Virtual/Augmented Reality
- Exchange of information or data between machines, computers, etc.
- Cloud computing (storage and processing of data in networked computers)
- Processing of big data or big data analysis
- Autonomous Robots
- Internet of Things (connecting physical objects to their virtual counterpart)
- Simulation
- RFID chips (Radio Frequency Identification for object tracking)
- Not sure
- Others (if any). Please write in the space:

33. What do you think are the three primary hindrances in transforming the current set up in line with Industry 4.0?

- Data theft and insecurity
- Fears and concerns of employees
- Insufficient employee qualification or expertise
- Limited finances
- Absence of suitable business partners or collaboration with industries
- Lack of management interest

- Unawareness about the benefits of Industry 4.0 among the employees and employers
- Inadequate IT infrastructure
- Others (if any). Please write in the space:

If you have some more suggestions for this survey or would like to write or detail something, please don't hesitate to write your comment below.

## **S2: Score Sheet**

Please rate these aspects on the scale of 1 to 9 (1, 2, 3, 4, 5, 6, 7, 8, 9), where 1 represents least important and 9 represents extremely important. Note that the two aspects can have same rating.

**Question 1: Please rate the importance of following factors for the implementation of Industry 4.0 in a University?**

| <b>Factors</b>                                                                         | <b>Rating</b> |
|----------------------------------------------------------------------------------------|---------------|
| Government/University willingness to support such programs                             |               |
| Presence of experts and staff to develop specialized talent                            |               |
| Understanding of employees and employer for the development of Industry 4.0            |               |
| Availability of magnificent infra-structure                                            |               |
| Existence of matured and well-established Computer science and Engineering departments |               |
| Greater access to Internet and higher band-width                                       |               |
| Greater support to inventions and patent generations                                   |               |

**Question 2: Please rate the significance of following constraints in the implementation of Industry 4.0 in a University?**

| <b>Factors</b>                               | <b>Rating</b> |
|----------------------------------------------|---------------|
| Lesser coordination or collaboration between |               |



various labs

Lack of funded projects

Low rate of collaboration between  
university/academics and industries (lesser  
number of real-problems)

Lack of specialized staff with substantial  
experience in industries

Inadequate educational programs/seminars  
specialized in digitalization and automation

Meagre projects or tasks with  
multi-disciplinary teams

Lesser inclination of the staff to develop their  
own system or retrofit the existing one

Dearth of continuing university strategies to  
promote, invest and generate awareness  
regarding Industry 4.0

Increased dependence on IT

**Question 3: Please rate the following factors as the benefits of Industry 4.0 in a University?**

| Factors                                                                                                             | Rating |
|---------------------------------------------------------------------------------------------------------------------|--------|
| Scope for domestic market growth                                                                                    |        |
| University can establish itself at the national and international level in implementing the concept of Industry 4.0 |        |
| Production of skilled labor force                                                                                   |        |
| Smart factories and intelligent applications                                                                        |        |
| Extensive collaboration with international universities as well as production sectors                               |        |

**Question 4: Please rate the following factors as the hindrance in the implementation of Industry 4.0 in a University?**

## Factors

## Rating

Security issues – Data theft or cyber-security

Intangible roadmap, strategies and framework

Requirements of large investments and uncertain profitability

Employee fear and concerns

### S3. Decision Matrices (Strengths, Weaknesses, Opportunities and Threats) from Experts (E1, E2, E3, and E4)

| E1                            |     | W   | E      | C        | I   | ED     | IA     | IP  |    |     |
|-------------------------------|-----|-----|--------|----------|-----|--------|--------|-----|----|-----|
| Willingness                   | W   | 1   | 1      | 0.5      | 2   | 1      | 0.5    | 1   |    |     |
| Experts                       | E   | 1   | 1      | 0.5      | 2   | 1      | 0.5    | 1   |    |     |
| Competitiveness               | C   | 2   | 2      | 1        | 3   | 2      | 1      | 2   |    |     |
| Infrastructure                | I   | 0.5 | 0.5    | 0.3333   | 1   | 0.5    | 0.3333 | 0.5 |    |     |
| Established Departments       | ED  | 1   | 1      | 0.5      | 2   | 1      | 0.5    | 1   |    |     |
| Internet Access               | IA  | 2   | 2      | 1        | 3   | 2      | 1      | 2   |    |     |
| Inventions & Patents          | IP  | 1   | 1      | 0.5      | 2   | 1      | 0.5    | 1   |    |     |
|                               |     |     |        |          |     |        |        |     |    |     |
|                               |     | LC  | F      | IC1      | SS  | EP     | M      | SDR | PS | IT  |
| Labs collaboration            | LC  | 1   | 1      | 0.5      | 1   | 2      | 2      | 1   | 2  | 1   |
| Funded projects               | F   | 1   | 1      | 0.5      | 1   | 2      | 2      | 1   | 2  | 1   |
| Industrial collaborations     | IC1 | 2   | 2      | 1        | 2   | 3      | 3      | 2   | 3  | 2   |
| Specialized Staff (Industry)  | SS  | 1   | 1      | 0.5      | 1   | 2      | 2      | 1   | 2  | 1   |
| Educational programs          | EP  | 0.5 | 0.5    | 0.333333 | 0.5 | 1      | 1      | 0.5 | 1  | 0.5 |
| Multi-disciplinary teams      | M   | 0.5 | 0.5    | 0.333333 | 0.5 | 1      | 1      | 0.5 | 1  | 0.5 |
| System development & Retrofit | SDR | 1   | 1      | 0.5      | 1   | 2      | 2      | 1   | 2  | 1   |
| Promoting strategies          | PS  | 0.5 | 0.5    | 0.333333 | 0.5 | 1      | 1      | 0.5 | 1  | 0.5 |
| IT dependence                 | IT  | 1   | 1      | 0.5      | 1   | 2      | 2      | 1   | 2  | 1   |
|                               |     |     |        |          |     |        |        |     |    |     |
|                               |     | DG  | WP     | SD       | SF  | IC2    |        |     |    |     |
| Domestic growth               | DG  | 1   | 2      | 1        | 1   | 0.5    |        |     |    |     |
| Worldwide popularity          | WP  | 0.5 | 1      | 0.5      | 0.5 | 0.3333 |        |     |    |     |
| Skill development             | SD  | 1   | 2      | 1        | 1   | 0.5    |        |     |    |     |
| Smart factories               | SF  | 1   | 2      | 1        | 1   | 0.5    |        |     |    |     |
| International collaborations  | IC2 | 2   | 3.0003 | 2        | 2   | 1      |        |     |    |     |
|                               |     |     |        |          |     |        |        |     |    |     |
|                               |     | SI  | IR     | HI       | EF  |        |        |     |    |     |
| Security Issues               | SI  | 1   | 2      | 1        | 1   |        |        |     |    |     |
| Intangible roadmap            | IR  | 0.5 | 1      | 0.5      | 0.5 |        |        |     |    |     |
| Huge investments              | HI  | 1   | 2      | 1        | 1   |        |        |     |    |     |
| Employee fear & concern       | EF  | 1   | 2      | 1        | 1   |        |        |     |    |     |

| E2 | W        | E        | C      | I | ED   | IA     | IP  |
|----|----------|----------|--------|---|------|--------|-----|
| W  | 1        | 3        | 5      | 7 | 4    | 2      | 6   |
| E  | 0.333333 | 1        | 3      | 5 | 2    | 0.5    | 4   |
| C  | 0.2      | 0.333333 | 1      | 3 | 0.5  | 0.25   | 2   |
| I  | 0.142857 | 0.2      | 0.3333 | 1 | 0.25 | 0.1667 | 0.5 |
| ED | 0.25     | 0.5      | 2      | 4 | 1    | 0.3333 | 3   |

|     |          |          |          |          |          |          |          |          |    |
|-----|----------|----------|----------|----------|----------|----------|----------|----------|----|
| IA  | 0.5      | 2        | 4        | 5.9988   | 3.0003   | 1        | 5        |          |    |
| IP  | 0.166667 | 0.25     | 0.5      | 2        | 0.333333 | 0.2      | 1        |          |    |
|     | LC       | F        | IC1      | SS       | EP       | M        | SDR      | PS       | IT |
| LC  | 1        | 0.25     | 0.3333   | 0.5      | 2        | 1        | 3        | 0.3333   | 5  |
| F   | 4        | 1        | 2        | 3        | 5        | 4        | 6        | 2        | 8  |
| IC1 | 3.0003   | 0.5      | 1        | 2        | 4        | 3        | 5        | 1        | 7  |
| SS  | 2        | 0.333333 | 0.5      | 1        | 3        | 2        | 4        | 0.5      | 6  |
| EP  | 0.5      | 0.2      | 0.25     | 0.333333 | 1        | 0.5      | 2        | 0.25     | 4  |
| M   | 1        | 0.25     | 0.333333 | 0.5      | 2        | 1        | 3        | 0.3333   | 5  |
| SDR | 0.333333 | 0.166667 | 0.2      | 0.25     | 0.5      | 0.333333 | 1        | 0.2      | 3  |
| PS  | 3.0003   | 0.5      | 1        | 2        | 4        | 3.0003   | 5        | 1        | 7  |
| IT  | 0.2      | 0.125    | 0.142857 | 0.166667 | 0.25     | 0.2      | 0.333333 | 0.142857 | 1  |
|     | DG       | WP       | SD       | SF       | IC2      |          |          |          |    |
| DG  | 1        | 2        | 3        | 4        | 0.5      |          |          |          |    |
| WP  | 0.5      | 1        | 2        | 3        | 0.3333   |          |          |          |    |
| SD  | 0.333333 | 0.5      | 1        | 2        | 0.25     |          |          |          |    |
| SF  | 0.25     | 0.333333 | 0.5      | 1        | 0.2      |          |          |          |    |
| IC2 | 2        | 3.0003   | 4        | 5        | 1        |          |          |          |    |
|     | SI       | IR       | HI       | EF       |          |          |          |          |    |
| SI  | 1        | 0.25     | 0.1667   | 1        |          |          |          |          |    |
| IR  | 4        | 1        | 0.3333   | 4        |          |          |          |          |    |
| HI  | 5.9988   | 3.0003   | 1        | 6        |          |          |          |          |    |
| EF  | 1        | 0.25     | 0.166667 | 1        |          |          |          |          |    |

|     |          |          |          |          |          |          |          |        |      |
|-----|----------|----------|----------|----------|----------|----------|----------|--------|------|
| E3  | W        | E        | C        | I        | ED       | IA       | IP       |        |      |
| W   | 1        | 1        | 3        | 5        | 5        | 2        | 7        |        |      |
| E   | 1        | 1        | 3        | 5        | 5        | 2        | 7        |        |      |
| C   | 0.333333 | 0.333333 | 1        | 3        | 3        | 0.5      | 5        |        |      |
| I   | 0.2      | 0.2      | 0.3333   | 1        | 1        | 0.25     | 3        |        |      |
| ED  | 0.2      | 0.2      | 0.333333 | 1        | 1        | 0.25     | 3        |        |      |
| IA  | 0.5      | 0.5      | 2        | 4        | 4        | 1        | 6        |        |      |
| IP  | 0.142857 | 0.142857 | 0.2      | 0.333333 | 0.333333 | 0.166667 | 1        |        |      |
|     | LC       | F        | IC1      | SS       | EP       | M        | SDR      | PS     | IT   |
| LC  | 1        | 0.25     | 0.25     | 2        | 0.25     | 2        | 0.3333   | 1      | 0.5  |
| F   | 4        | 1        | 1        | 4        | 1        | 6        | 2        | 4      | 3    |
| IC1 | 4        | 1        | 1        | 4        | 1        | 4        | 4        | 4      | 3    |
| SS  | 0.5      | 0.25     | 0.25     | 1        | 0.25     | 3        | 0.3333   | 1      | 0.5  |
| EP  | 4        | 1        | 1        | 4        | 1        | 6        | 2        | 4      | 3    |
| M   | 0.5      | 0.166667 | 0.25     | 0.333333 | 0.166667 | 1        | 0.2      | 0.3333 | 0.25 |
| SDR | 3.0003   | 0.5      | 0.25     | 3.0003   | 0.5      | 5        | 1        | 3      | 2    |
| PS  | 1        | 0.25     | 0.25     | 1        | 0.25     | 3.0003   | 0.333333 | 1      | 0.5  |
| IT  | 2        | 0.333333 | 0.333333 | 2        | 0.333333 | 4        | 0.5      | 2      | 1    |
|     | DG       | WP       | SD       | SF       | IC2      |          |          |        |      |
| DG  | 1        | 0.25     | 0.25     | 1        | 1        |          |          |        |      |
| WP  | 4        | 1        | 1        | 4        | 4        |          |          |        |      |
| SD  | 4        | 1        | 1        | 4        | 4        |          |          |        |      |
| SF  | 1        | 0.25     | 0.25     | 1        | 1        |          |          |        |      |
| IC2 | 1        | 0.25     | 0.25     | 1        | 1        |          |          |        |      |
|     | SI       | IR       | HI       | EF       |          |          |          |        |      |
| SI  | 1        | 0.2      | 1        | 3        |          |          |          |        |      |
| IR  | 5        | 1        | 5        | 7        |          |          |          |        |      |
| HI  | 1        | 0.2      | 1        | 3        |          |          |          |        |      |
| EF  | 0.333333 | 0.142857 | 0.333333 | 1        |          |          |          |        |      |

|     |          |          |        |          |        |        |        |        |        |
|-----|----------|----------|--------|----------|--------|--------|--------|--------|--------|
| E4  | W        | E        | C      | I        | ED     | IA     | IP     |        |        |
| W   | 1        | 2        | 3      | 1        | 1      | 1      | 2      |        |        |
| E   | 0.5      | 1        | 4      | 2        | 2      | 2      | 3      |        |        |
| C   | 0.333333 | 0.25     | 1      | 0.3333   | 0.3333 | 0.3333 | 0.5    |        |        |
| I   | 1        | 0.5      | 3.0003 | 1        | 1      | 1      | 2      |        |        |
| ED  | 1        | 0.5      | 3.0003 | 1        | 1      | 1      | 2      |        |        |
| IA  | 1        | 0.5      | 3.0003 | 1        | 1      | 1      | 2      |        |        |
| IP  | 0.5      | 0.333333 | 2      | 0.5      | 0.5    | 0.5    | 1      |        |        |
|     | LC       | F        | IC1    | SS       | EP     | M      | SDR    | PS     | IT     |
| LC  | 1        | 0.5      | 0.5    | 0.25     | 0.3333 | 0.5    | 0.5    | 0.5    | 0.25   |
| F   | 2        | 1        | 1      | 0.3333   | 0.5    | 1      | 1      | 1      | 0.3333 |
| IC1 | 2        | 1        | 1      | 0.3333   | 0.5    | 1      | 1      | 1      | 0.3333 |
| SS  | 4        | 3.0003   | 3.0003 | 1        | 2      | 3      | 3      | 3      | 1      |
| EP  | 3.0003   | 2        | 2      | 0.5      | 1      | 2      | 2      | 2      | 0.5    |
| M   | 2        | 1        | 1      | 0.333333 | 0.5    | 1      | 1      | 1      | 0.3333 |
| SDR | 2        | 1        | 1      | 0.333333 | 0.5    | 1      | 1      | 1      | 0.3333 |
| PS  | 2        | 1        | 1      | 0.333333 | 0.5    | 1      | 1      | 1      | 0.3333 |
| IT  | 4        | 3.0003   | 3.0003 | 1        | 2      | 3.0003 | 3.0003 | 3.0003 | 1      |
|     | DG       | WP       | SD     | SF       | IC2    |        |        |        |        |
| DG  | 1        | 0.25     | 0.3333 | 0.5      | 0.25   |        |        |        |        |
| WP  | 4        | 1        | 2      | 3        | 1      |        |        |        |        |
| SD  | 3.0003   | 0.5      | 1      | 2        | 0.5    |        |        |        |        |
| SF  | 2        | 0.333333 | 0.5    | 1        | 0.3333 |        |        |        |        |
| IC2 | 4        | 1        | 2      | 3.0003   | 1      |        |        |        |        |
|     | SI       | IR       | HI     | EF       |        |        |        |        |        |
| SI  | 1        | 1        | 2      | 2        |        |        |        |        |        |
| IR  | 1        | 1        | 2      | 2        |        |        |        |        |        |
| HI  | 0.5      | 0.5      | 1      | 1        |        |        |        |        |        |
| EF  | 0.5      | 0.5      | 1      | 1        |        |        |        |        |        |

#### S4. Computation of CR (Expert - E1 and Matrix - Strength)

E1/Strength

|    | W   | E   | C      | I | ED  | IA     | IP  | Product | nth root | Eigen vector | Aw              | $\lambda$ |
|----|-----|-----|--------|---|-----|--------|-----|---------|----------|--------------|-----------------|-----------|
| W  | 1   | 1   | 0.5    | 2 | 1   | 0.5    | 1   | 0.5     | 0.9057   | 0.1193       | 0.8357          | 7.0053    |
| E  | 1   | 1   | 0.5    | 2 | 1   | 0.5    | 1   | 0.5     | 0.9057   | 0.1193       | 0.8357          | 7.0053    |
| C  | 2   | 2   | 1      | 3 | 2   | 1      | 2   | 48      | 1.7388   | 0.2290       | 1.6067          | 7.0151    |
| I  | 0.5 | 0.5 | 0.3333 | 1 | 0.5 | 0.3333 | 0.5 | 0.0069  | 0.4915   | 0.0647       | 0.4560          | 7.0433    |
| ED | 1   | 1   | 0.5    | 2 | 1   | 0.5    | 1   | 0.5     | 0.9057   | 0.1193       | 0.8357          | 7.0053    |
| IA | 2   | 2   | 1      | 3 | 2   | 1      | 2   | 48      | 1.7388   | 0.2290       | 1.6067          | 7.0151    |
| IP | 1   | 1   | 0.5    | 2 | 1   | 0.5    | 1   | 0.5     | 0.9057   | 0.1193       | 0.8357          | 7.0053    |
|    |     |     |        |   |     |        |     |         | 7.5919   |              | $\lambda_{max}$ | 7.0135    |
|    |     |     |        |   |     |        |     |         |          |              | CI              | 0.0023    |
|    |     |     |        |   |     |        |     |         |          |              | CR              | 0.0017    |

0.17

#### Calculation steps –

- For each row (R), compute the  $m^{th}$  root

$$R1 = (1 \times 1 \times 0.5 \times 2 \times 1 \times 0.5 \times 1)^{1/7} = 0.9057$$

$$(m = \text{number of factors} = 7)$$

$$R2 = (1 \times 1 \times 0.5 \times 2 \times 1 \times 0.5 \times 1)^{1/7} = 0.9057$$

$$R3 = (2 \times 2 \times 1 \times 3 \times 2 \times 1 \times 2)^{1/7} = 1.7388$$

$$R4 = (0.5 \times 0.5 \times 0.3333 \times 1 \times 0.5 \times 0.3333 \times 0.5)^{1/7} = 0.4915$$

$$R5 = (1 \times 1 \times 0.5 \times 2 \times 1 \times 0.5 \times 1)^{1/7} = 0.9057$$

$$R3 = (2 \times 2 \times 1 \times 3 \times 2 \times 1 \times 2)^{1/7} = 1.7388$$

$$R7 = (1 \times 1 \times 0.5 \times 2 \times 1 \times 0.5 \times 1)^{1/7} = 0.9057$$

$$\text{Sum}(n) = 0.9057 + 0.9057 + 1.7388 + 0.4915 + 0.9057 + 1.7388 + 0.9057$$

$$\text{Sum}(n) = 7.5919$$

- Compute Eigen vector for each row

$$R1 = 0.9057/\text{Sum}(n); R1 = 0.9057/7.5919 = 0.1193$$

$$R2 = 0.9057/7.5919 = 0.1193$$

$$R3 = 1.7388/7.5919 = 0.2290$$

$$R4 = 0.4915/7.5919 = 0.0647$$

$$R5 = 0.9057/7.5919 = 0.1193$$

$$R6 = 1.7388/7.5919 = 0.2290$$

$$R7 = 0.9057/7.5919 = 0.1193$$

- Compute  $A_w$  – Multiplying each row of decision matrix by column matrix (Eigen vector)

$$R1 = \begin{bmatrix} 1 & 1 & 0.5 & 2 & 1 & 0.5 & 1 \end{bmatrix} \begin{bmatrix} 0.1193 \\ 0.1193 \\ 0.2290 \\ 0.0647 \\ 0.1193 \\ 0.2290 \\ 0.1193 \end{bmatrix} = 0.8357$$

$$\text{Similarly, } R2 = 0.8357; R3 = 1.6067; R4 = 0.4560; R5 = 0.8357; R6 = 1.6067; R7 = 0.8357$$

- Compute the values of  $\lambda$  ( $A_w/\text{Eigen vector}$ )

$$\lambda_1 = 0.8357/0.1193 = 7.0053;$$

$$\lambda_2 = 0.8357/0.1193 = 7.0053;$$

$$\lambda_3 = 1.6067/0.2290 = 7.0151;$$

$$\lambda_4 = 0.4560/0.0647 = 7.0433;$$

$$\lambda_5 = 0.8357/0.1193 = 7.0053;$$

$$\lambda_6 = 1.6067/0.2290 = 7.0151;$$

$$\lambda_7 = 0.8357/0.1193 = 7.0053;$$

$$\lambda_{\max} = (7.0053 + 7.0053 + 7.0151 + 7.0433 + 7.0053 + 7.0151 + 7.0053)/7 = 7.0135$$

- Estimate CI

$$CI = (\lambda_{\max} - n)/(n-1) = (7.0135 - 7)/6 = 0.0023$$

- Compute CR

$$CR = CI/RI = 0.0032/1.32 = 0.17$$

Similarly, CR can be computed for other decision matrices.

## S5. Computation of weights for each factor (Expert - E1 and Matrix - Strength)

---

E1

---

| Iteration    |    |            |        |        |         |        |         |         |                 |        |
|--------------|----|------------|--------|--------|---------|--------|---------|---------|-----------------|--------|
| 1            |    | I1         |        |        |         |        |         |         |                 |        |
|              | W  | 1          | 1      | 0.5    | 2       | 1      | 0.5     | 1       |                 |        |
|              | E  | 1          | 1      | 0.5    | 2       | 1      | 0.5     | 1       |                 |        |
|              | C  | 2          | 2      | 1      | 3       | 2      | 1       | 2       |                 |        |
|              | I  | 0.5        | 0.5    | 0.3333 | 1       | 0.5    | 0.3333  | 0.5     |                 |        |
|              | ED | 1          | 1      | 0.5    | 2       | 1      | 0.5     | 1       |                 |        |
|              | IA | 2          | 2      | 1      | 3       | 2      | 1       | 2       |                 |        |
|              | IP | 1          | 1      | 0.5    | 2       | 1      | 0.5     | 1       |                 |        |
|              |    |            |        |        |         |        |         |         |                 |        |
| I2 = I1xI1   |    |            |        |        |         |        |         |         | Column Sum (CS) | CS/RS  |
|              | W  | 7          | 7      | 3.6667 | 13      | 7      | 3.6666  | 7       | 48.33326667     | 0.1191 |
|              | E  | 7          | 7      | 3.6667 | 13      | 7      | 3.6666  | 7       | 48.33326667     | 0.1191 |
|              | C  | 13.5       | 13.5   | 7      | 25      | 13.5   | 6.9999  | 13.5    | 92.9999         | 0.2293 |
|              | I  | 3.8333     | 3.8333 | 2      | 6.9999  | 3.8333 | 1.99993 | 3.83327 | 26.33286667     | 0.0649 |
|              | ED | 7          | 7      | 3.6667 | 13      | 7      | 3.6666  | 7       | 48.33326667     | 0.1191 |
|              | IA | 13.5       | 13.5   | 7      | 25      | 13.5   | 6.9999  | 13.5    | 92.9999         | 0.2293 |
|              | IP | 7          | 7      | 3.6667 | 13      | 7      | 3.6666  | 7       | 48.33326667     | 0.1191 |
| Row Sum (RS) |    |            |        |        |         |        |         |         | 405.6657333     |        |
|              |    |            |        |        |         |        |         |         |                 |        |
|              |    |            |        |        |         |        |         |         |                 |        |
| 2            |    | I3 = I2xI2 |        |        |         |        |         |         | Column Sum (CS) | CS/RS  |
|              | W  | 344.83     | 344.83 | 180    | 638.33  | 344.83 | 179.996 | 344.832 | 2377.6518       | 0.1192 |
|              | E  | 344.83     | 344.83 | 180    | 638.33  | 344.83 | 179.996 | 344.832 | 2377.6518       | 0.1192 |
|              | C  | 662.83     | 662.83 | 346    | 1227    | 662.83 | 345.993 | 662.83  | 4570.307367     | 0.2291 |
|              | I  | 188.16     | 188.16 | 98.22  | 348.326 | 188.16 | 98.2185 | 188.163 | 1297.414933     | 0.065  |
|              | ED | 344.83     | 344.83 | 180    | 638.33  | 344.83 | 179.996 | 344.832 | 2377.6518       | 0.1192 |
|              | IA | 662.83     | 662.83 | 346    | 1227    | 662.83 | 345.993 | 662.83  | 4570.307367     | 0.2291 |
|              | IP | 344.83     | 344.83 | 180    | 638.33  | 344.83 | 179.996 | 344.832 | 2377.6518       | 0.1192 |
| Row Sum (RS) |    |            |        |        |         |        |         |         | 19948.63687     |        |
| 3            |    | I4 = I3xI3 |        |        |         |        |         |         | Column Sum (CS) | CS/RS  |

|              |        |        |        |         |        |        |         |             |        |
|--------------|--------|--------|--------|---------|--------|--------|---------|-------------|--------|
| W            | 834361 | 834361 | 435532 | 1544525 | 834361 | 435525 | 834361  | 5753025.493 | 0.1192 |
| E            | 834361 | 834361 | 435532 | 1544525 | 834361 | 435525 | 834361  | 5753025.493 | 0.1192 |
| C            | 2E+06  | 2E+06  | 837179 | 2968883 | 2E+06  | 837165 | 1603807 | 11058452.44 | 0.2291 |
| I            | 455285 | 455285 | 237656 | 842800  | 455285 | 237652 | 455285  | 3139248.518 | 0.065  |
| ED           | 834361 | 834361 | 435532 | 1544525 | 834361 | 435525 | 834361  | 5753025.493 | 0.1192 |
| IA           | 2E+06  | 2E+06  | 837179 | 2968883 | 2E+06  | 837165 | 1603807 | 11058452.44 | 0.2291 |
| IP           | 834361 | 834361 | 435532 | 1544525 | 834361 | 435525 | 834361  | 5753025.493 | 0.1192 |
| Row Sum (RS) |        |        |        |         |        |        |         | 48268255.37 |        |

As shown in the above table that the values of CS/RS are same in iteration 2 and 3. Therefore, the values of CS/RS represent the weights for each “Strength” factors. Similarly, the weights for other Experts E2, E3, and E4 was estimated.

| Factors                 | Weights |        |        |        |        | Normalized weight<br>(GM/Sum <sub>GM</sub> ) |
|-------------------------|---------|--------|--------|--------|--------|----------------------------------------------|
|                         | E1      | E2     | E3     | E4     | GM     |                                              |
| Willingness             | 0.1192  | 0.3543 | 0.2814 | 0.1959 | 0.2196 | 0.2380                                       |
| Experts                 | 0.1192  | 0.1587 | 0.2814 | 0.2300 | 0.1870 | 0.2027                                       |
| Competitiveness         | 0.2291  | 0.0676 | 0.1200 | 0.0501 | 0.0982 | 0.1064                                       |
| Infrastructure          | 0.0650  | 0.0312 | 0.0542 | 0.1479 | 0.0635 | 0.0688                                       |
| Established departments | 0.1192  | 0.1036 | 0.0542 | 0.1479 | 0.0998 | 0.1081                                       |
| Internet access         | 0.2291  | 0.2399 | 0.1813 | 0.1479 | 0.1960 | 0.2124                                       |
| Inventions and patents  | 0.1192  | 0.0448 | 0.0276 | 0.0801 | 0.0586 | 0.0635                                       |
| Sum <sub>GM</sub>       |         |        |        |        | 0.9227 |                                              |

GM (Willingness) =  $(0.1192 \times 0.3543 \times 0.2814 \times 0.1959)^{1/4} = 0.2196$ . Similarly, the GM for other factors can be estimated.

## S6. Computation of Score for SWOT factors

The Value represents the mean of ratings by the respondents in the questionnaires. For the factor “Willingness” the value was 3.4177.

Weight estimated for “Willingness” by AHP was 0.2380.

Score computed for “Willingness” =  $3.4177 \times 0.2380 = 0.8135$

Similarly, the scores for the other “Strength” factors were obtained as in the following table. By adding the scores for each “Strength” factor, the score for the Strength group “S” was calculated as 3.4969. Similarly, the scores of other groups were also computed as W = 3.1433; O = 3.7229; and T = 3.3567. Finally, the differences of (S-W) and (O-T) were plotted in the SWOT diagram to obtain the strategic position.

| SWOT factors | Value | Weight | Value*Weight |
|--------------|-------|--------|--------------|
|--------------|-------|--------|--------------|

|                                                                                    |        |        |        |
|------------------------------------------------------------------------------------|--------|--------|--------|
| University willingness to support programs pertaining to<br>Industry 4.0           | 3.4177 | 0.2380 | 0.8135 |
| Presence of experts and staff to develop the specialized<br>talents                | 3.2152 | 0.2027 | 0.6517 |
| Availability of the infrastructure, mandatory to Industry 4.0                      | 2.8987 | 0.0688 | 0.1995 |
| Matured and well-established Computer science and<br>Engineering departments       | 3.4051 | 0.1081 | 0.3681 |
| Internet accessibility and speed within the university?                            | 3.7975 | 0.2124 | 0.8064 |
| Support to inventions and patent generations                                       | 3.6709 | 0.0635 | 0.2332 |
| Digital transformation could improve competitiveness at<br>the international stage | 3.9873 | 0.1064 | 0.4244 |
|                                                                                    |        |        | 3.4969 |
